# Supplementary material for: Solvatofluorochromic, non-centrosymmetric π-expanded diketopyrrolopyrrole
Source: Royal Society of Chemistry journal article supplement (doi:10.1039/c5ob02583d), 2016-01-01

Supporting information for:

## Solvatofluorochromic, non-centrosymmetric $\pi$ -expanded diketopyrrolopyrrole

Marek Grzybowski, Artur Jeżewski, Irena Deperasińska, Daniel H. Friese, Marzena Banasiewicz,  
Vincent Hugues, Bolesław Kozankiewicz, Mireille Blanchard-Desce and Daniel T. Gryko

### Table of Contents

|                          |       |
|--------------------------|-------|
| 1. Crystallographic data | S1-S2 |
| 2. Optical data          | S3    |
| 2. NMR data              | S4-S9 |

### 1. Crystallographic data

X-ray structure determining of 5-(tert-butyl)-9-(3,4-dimethoxyphenyl)-10-(3,3-dimethyl-2-oxobutyl)-2,3-dimethoxy-8H-pyrrolo[3',4':3,4]pyrrolo[2,1-a]isoquinoline-8,11(10H)-dione (3)

Crystal data and measurement conditions are given in Table S-1. The structure was solved by the SHELXL-1997 (Sheldrick, 1997) program.

Table S-1. Crystal data and measurement conditions for 5-(tert-butyl)-9-(3,4-dimethoxyphenyl)-10-(3,3-dimethyl-2-oxobutyl)-2,3-dimethoxy-8H-pyrrolo[3',4':3,4]pyrrolo [2,1-a]isoquinoline-8,11(10H)-dione (3)

|                                                                    |                                                                                |
|--------------------------------------------------------------------|--------------------------------------------------------------------------------|
| Formula                                                            | C <sub>69</sub> H <sub>78</sub> Cl <sub>2</sub> N <sub>4</sub> O <sub>14</sub> |
| Molecular weight g/mol                                             | 1258.25                                                                        |
| Crystal system                                                     | tetragonal                                                                     |
| <i>a</i> [Å]                                                       | 16.4941(7)                                                                     |
| <i>b</i> [Å]                                                       | 16.4941(7)                                                                     |
| <i>c</i> [Å]                                                       | 24.5221(9)                                                                     |
| <i>V</i> [Å <sup>3</sup> ]                                         | 6671.4(5)                                                                      |
| Molecular multiplicity                                             | Z=8                                                                            |
| Calculated density [g/cm <sup>3</sup> ]                            | 1.253                                                                          |
| Space group                                                        | <i>P</i> -4 <i>b</i> 2                                                         |
| Radiation (mirror monochromated)                                   | Cu K $\alpha$                                                                  |
| Wavelength [Å]                                                     | 1.54184                                                                        |
| Absorption coefficient [mm <sup>-1</sup> ]                         | 1.420                                                                          |
| F(000)                                                             | 2664                                                                           |
| Crystal size [mm]                                                  | 0.17 x 0.15 x 0.03                                                             |
| Temperature [K]                                                    | 100.0(1)                                                                       |
| Scan range (2 $\theta$ ) [deg]                                     | 3.60-72.03                                                                     |
| Number of collected data:                                          |                                                                                |
| total measured                                                     | 5854                                                                           |
| unique [with <i>I</i> > 2 $\sigma$ ( <i>I</i> )]                   | 3215                                                                           |
| <i>R</i> <sub><i>I</i></sub> [ <i>I</i> > 2 $\sigma$ ( <i>I</i> )] | 0.0749                                                                         |

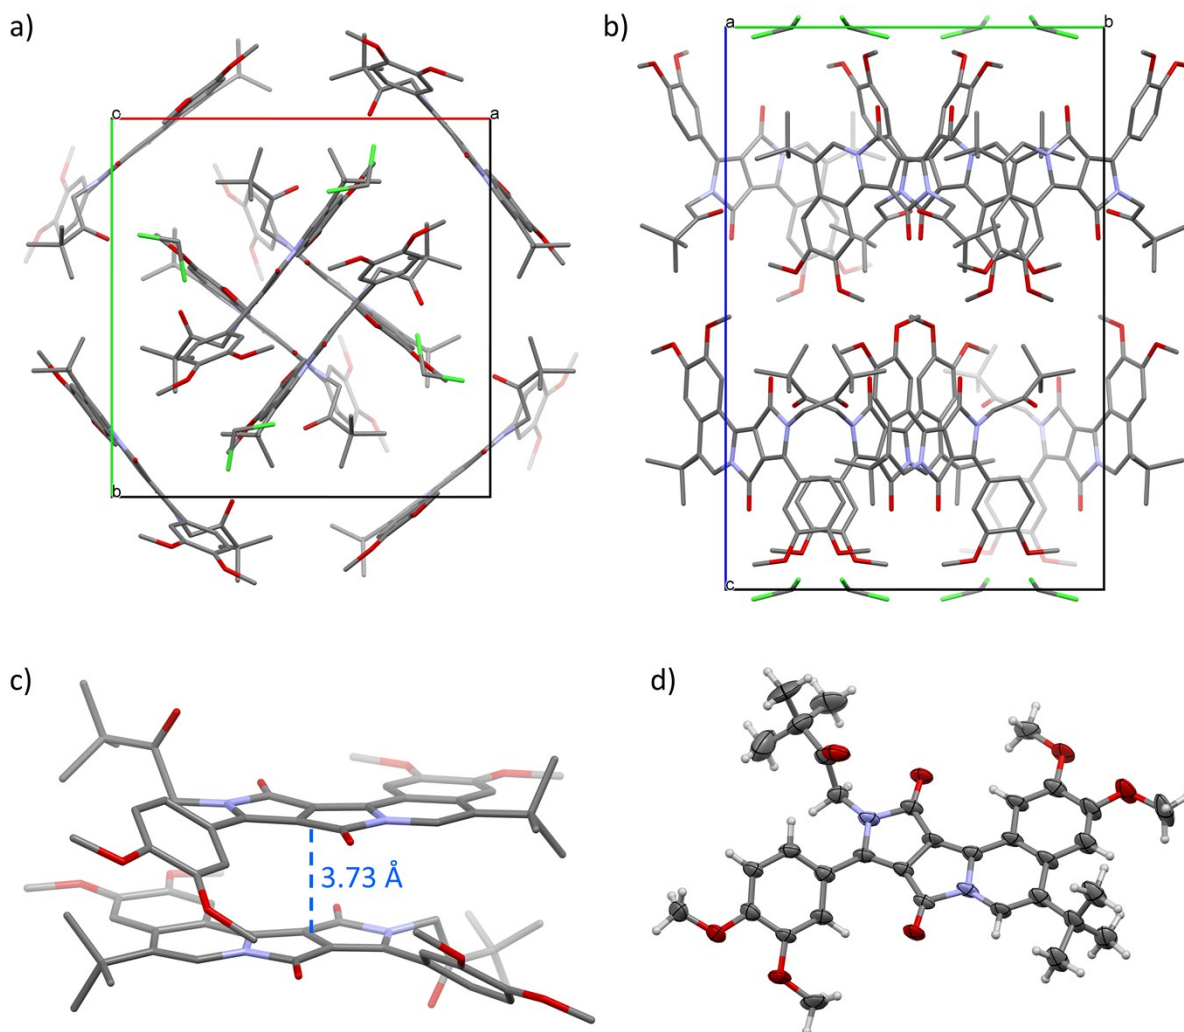

**Figure S1.** Crystal structure of compound **3**: a), b) Packing of the molecules in the crystal unit cell along crystal *c* and *b* axis respectively; c) Dimer of molecules connected by  $\pi$ - $\pi$  interactions; d) Thermal ellipsoid plot of compound **3** with the ellipsoids drawn at 50 % probability level. On a), b) c) hydrogen atoms were omitted for clarity.

## 2. Optical data.

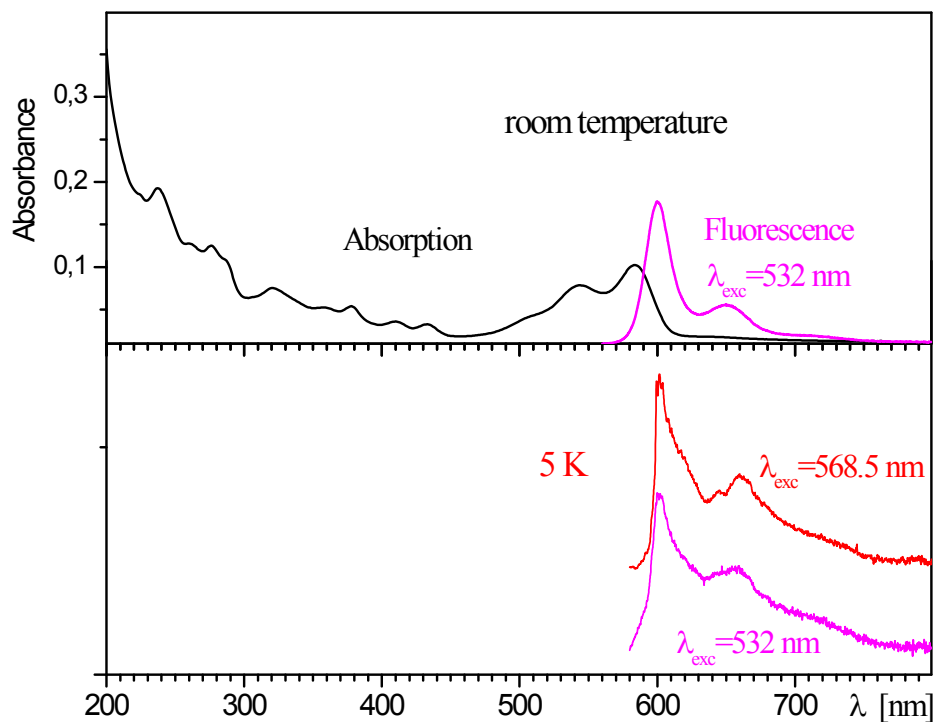

**Figure S2.** Absorption (solid black line) and emission (magenta and red lines) spectra of compound **3** in *n*-hexane at room temperature and at 5 K.

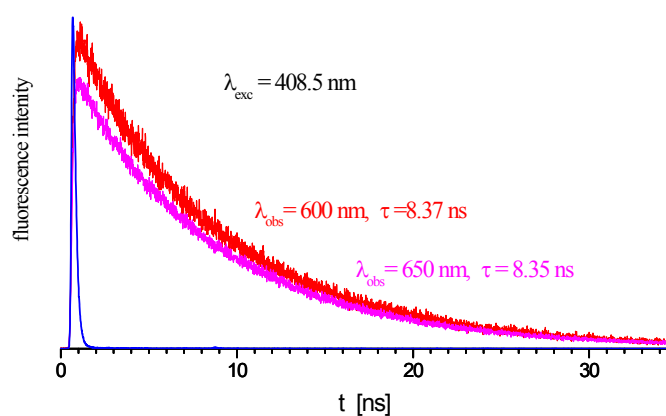

**Figure S3.** Fluorescence decay curves of compound **3** in *n*-hexane at room temperature.

### 3. Spectral data

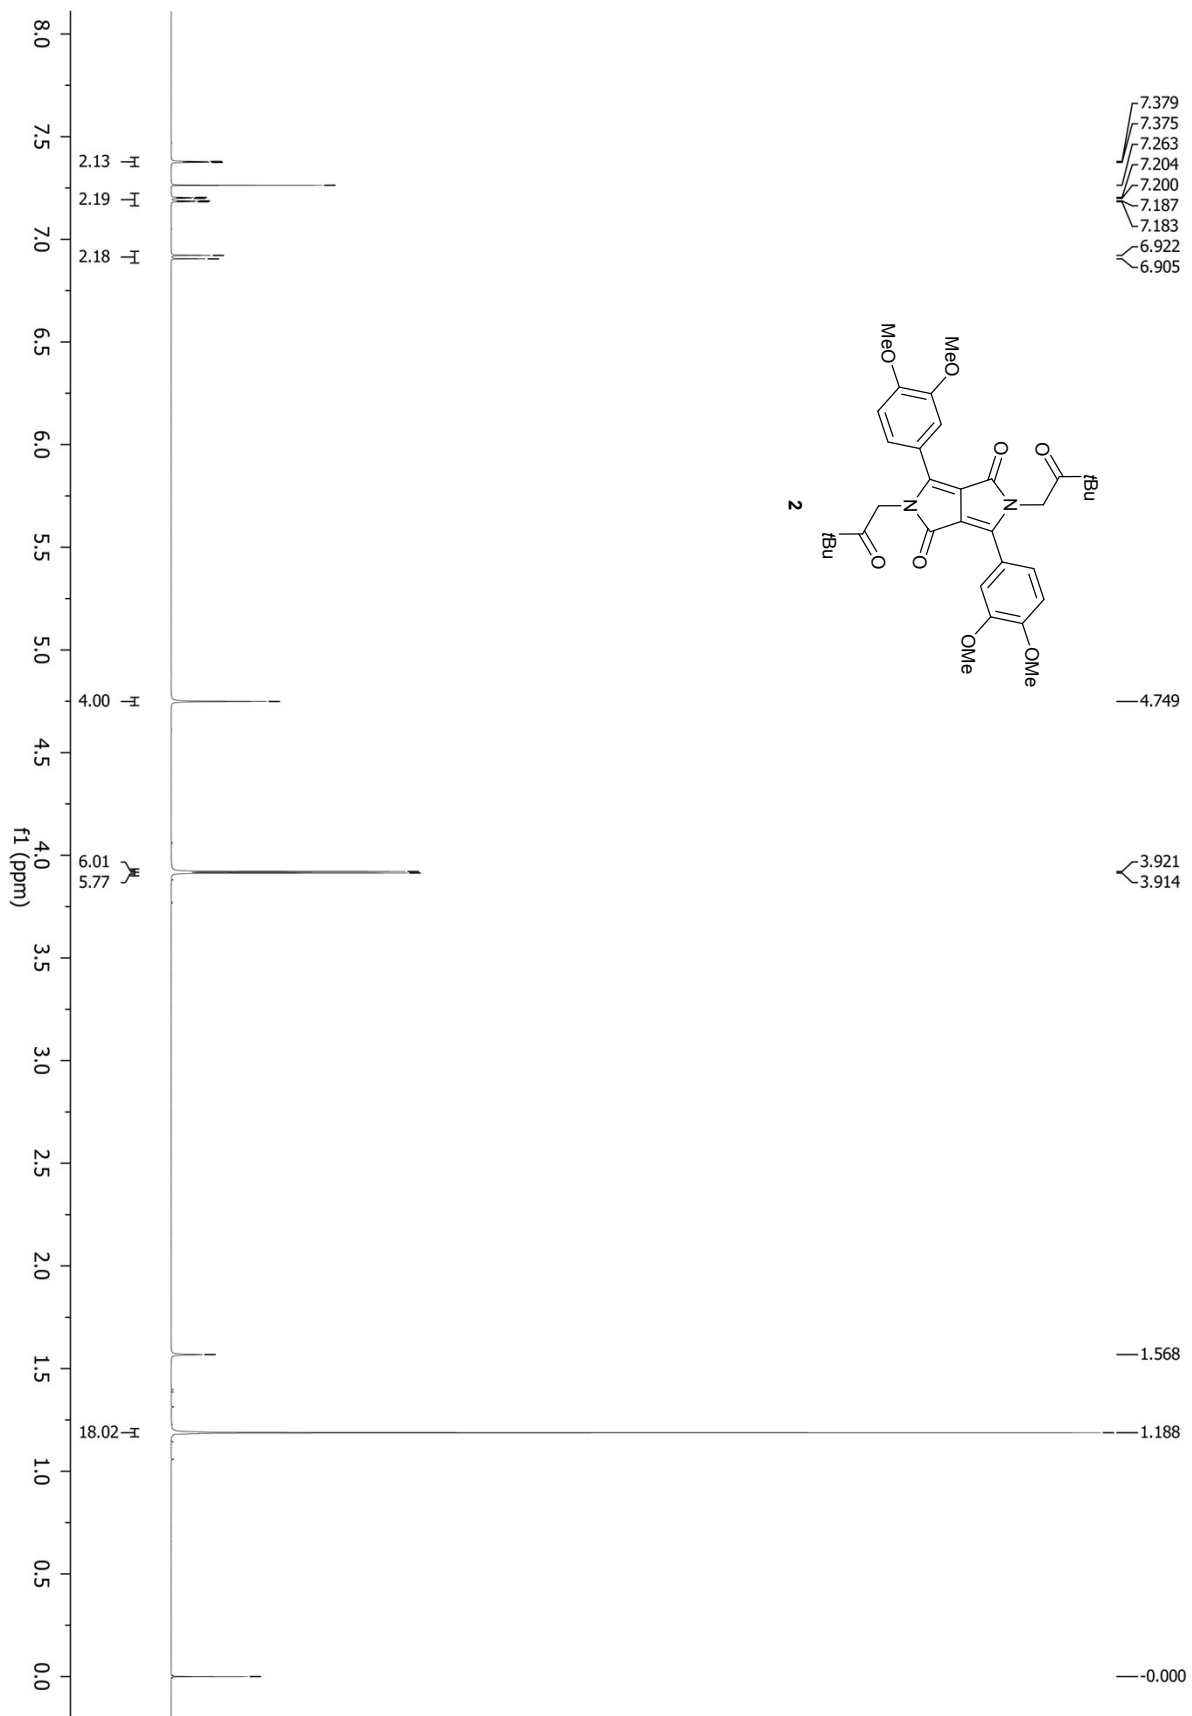

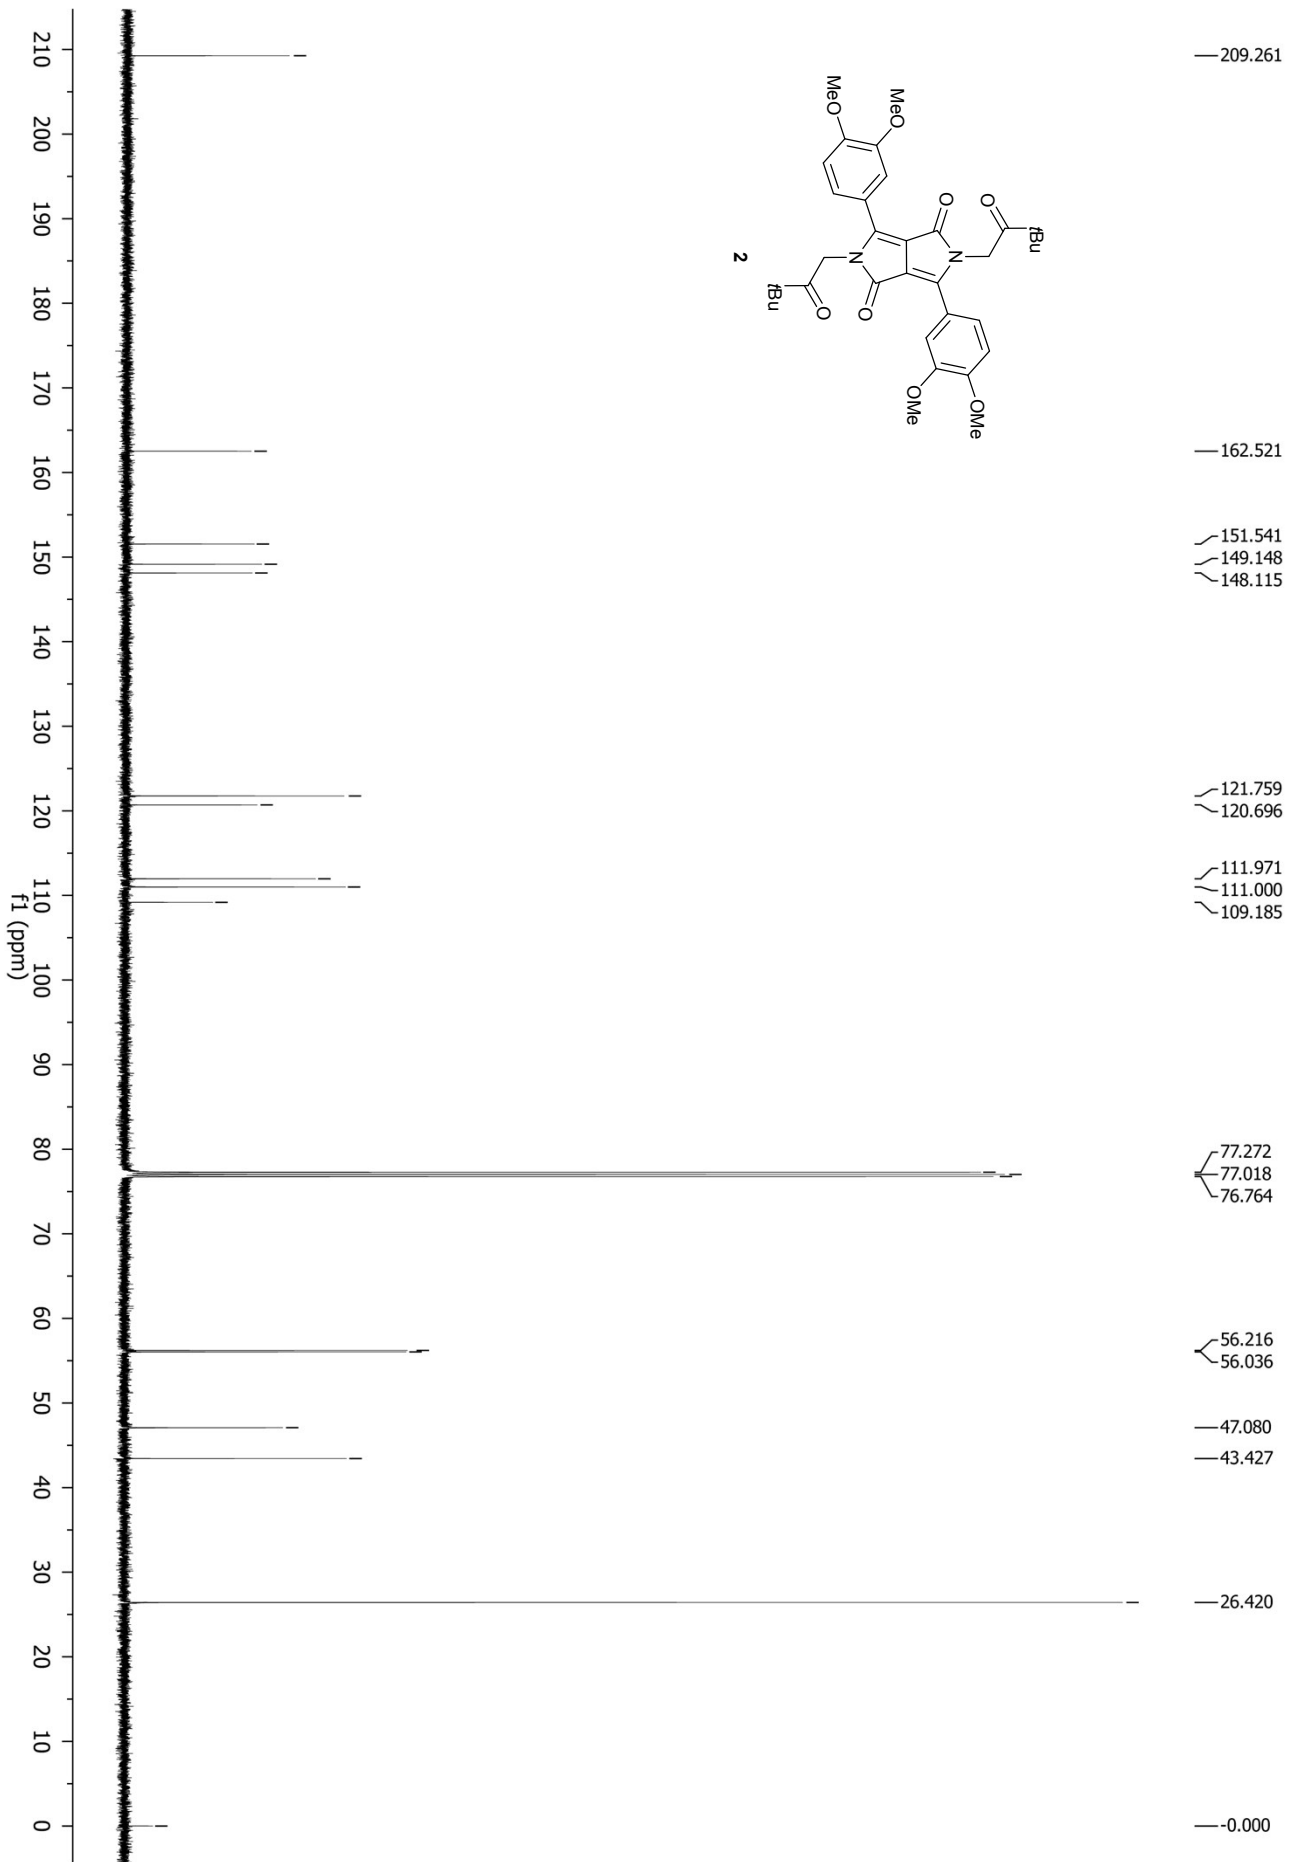

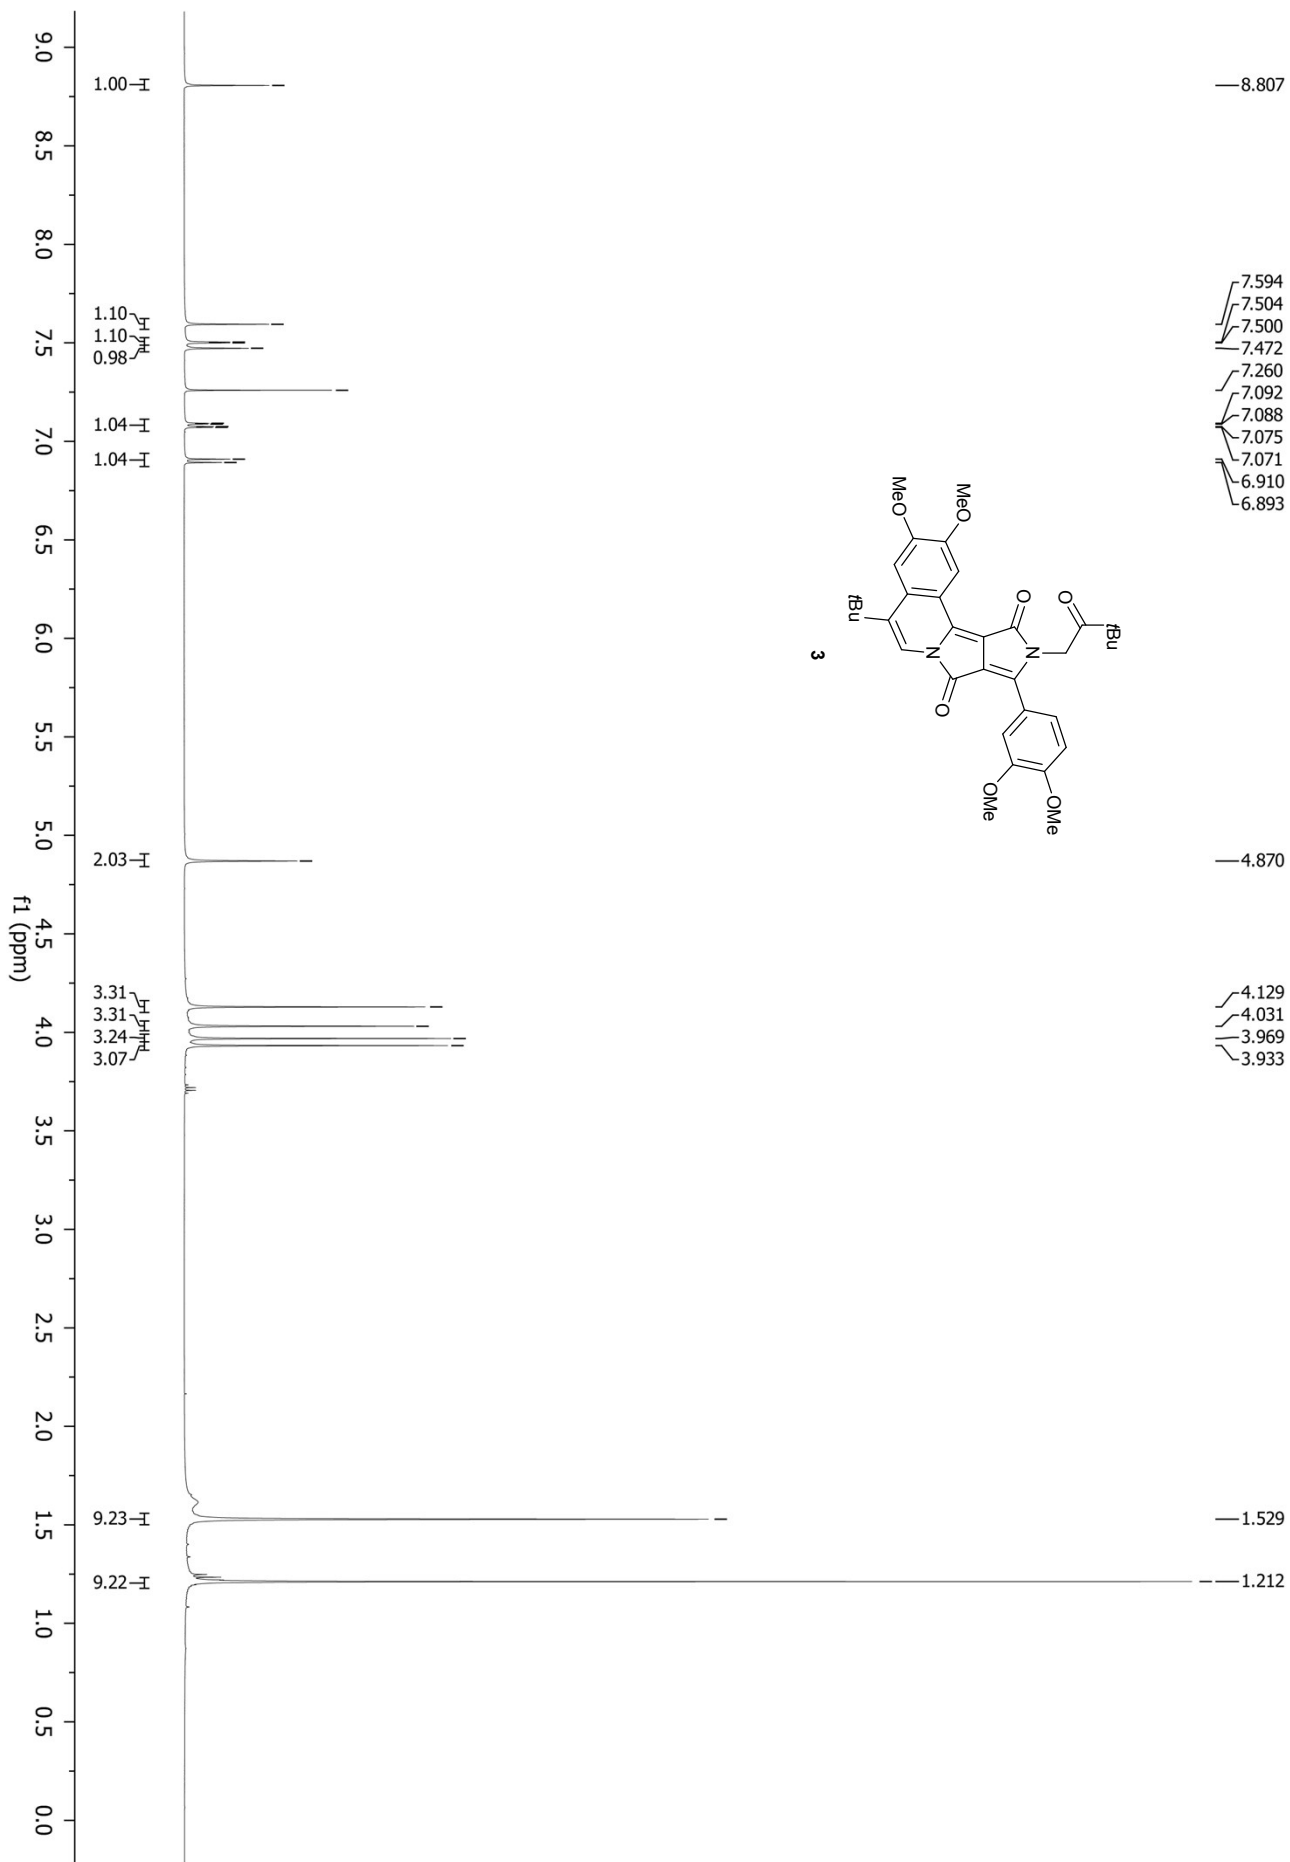

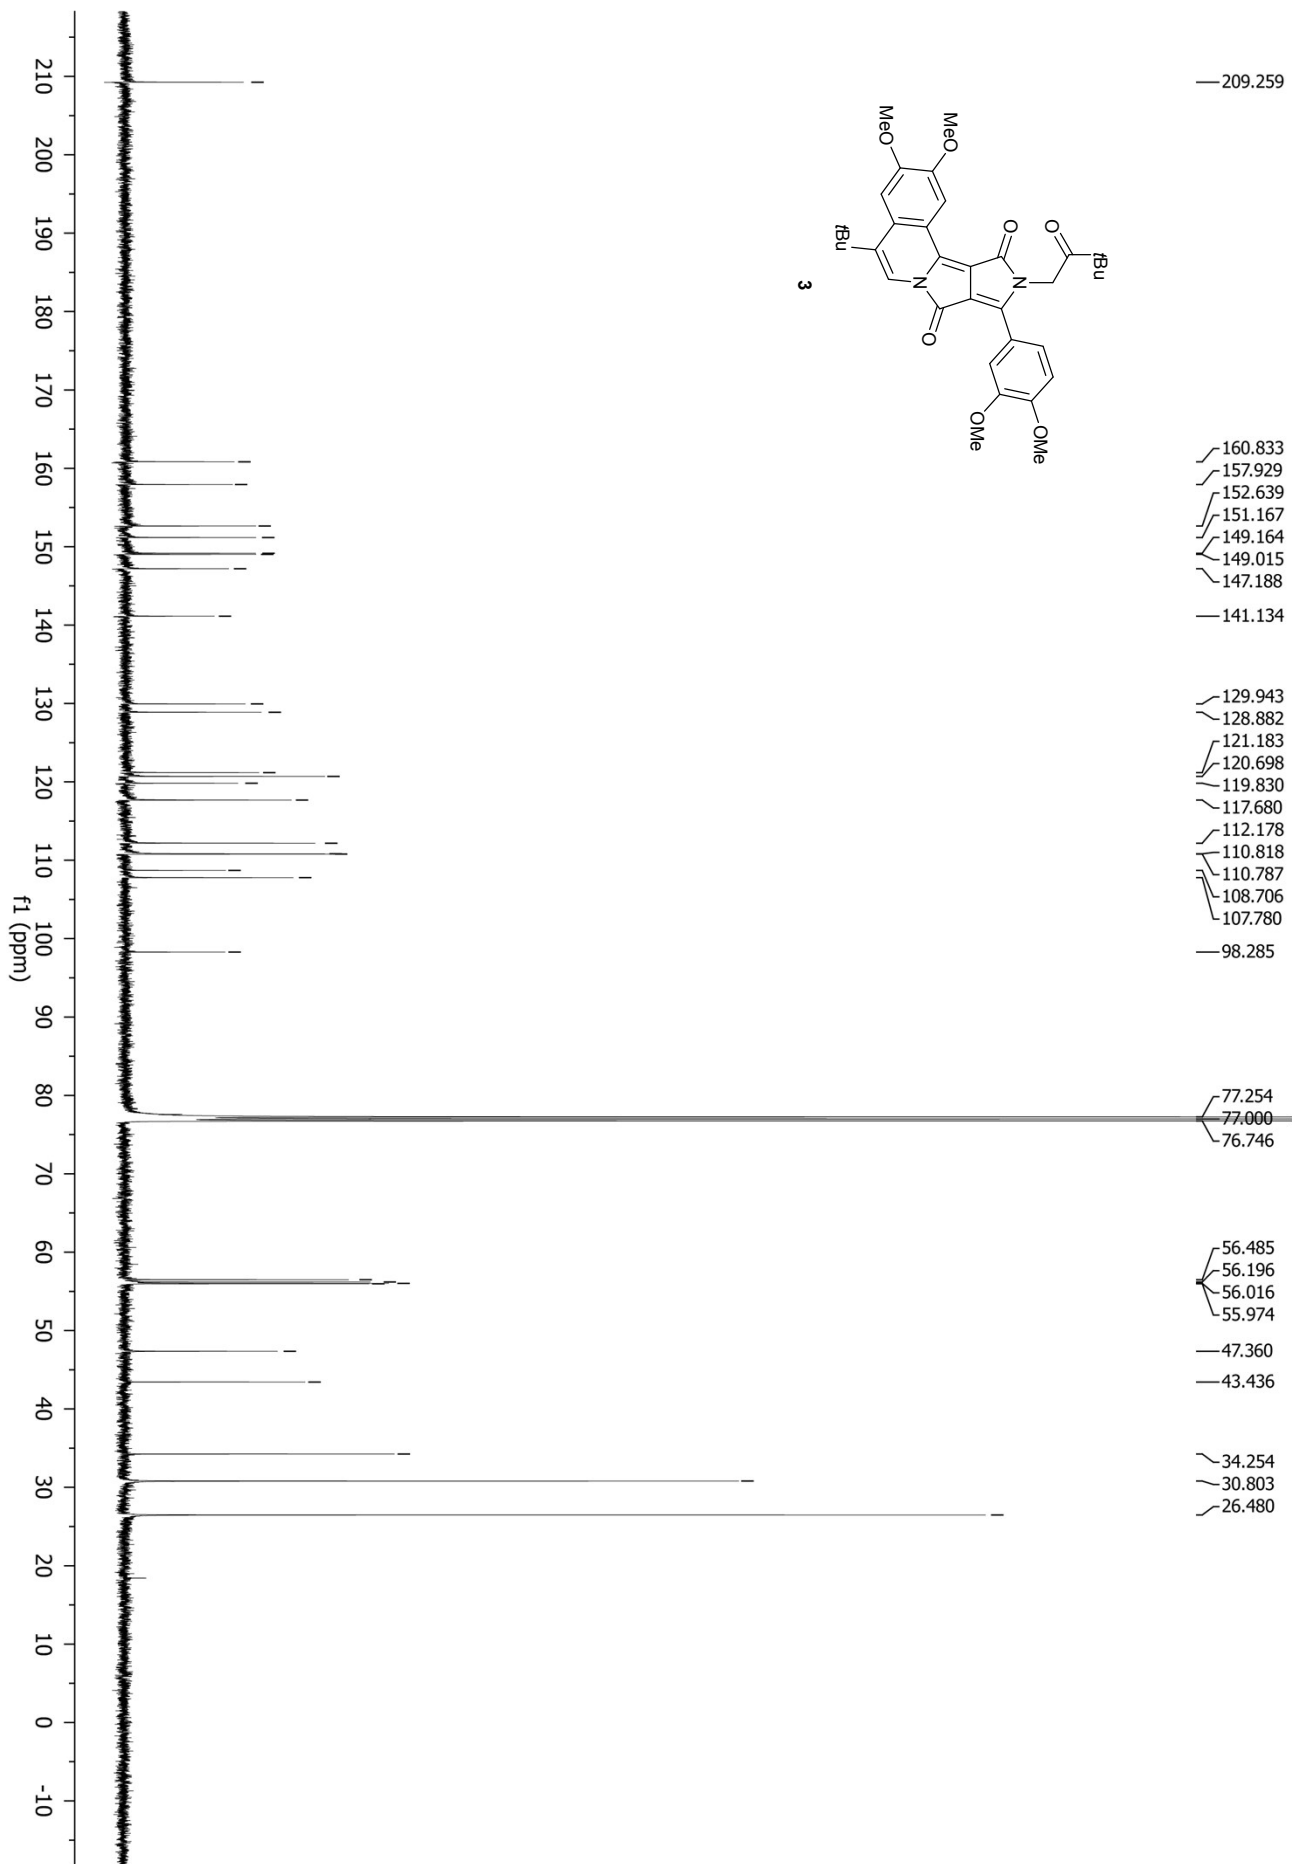

Supplement: c5ob02583d1.pdf [file c5ob02583d1.pdf]
